# Supplementary material
Source: Springer Nature journal article supplement (https://www.springermedizin.de/resource/supplementary/12891_2008_601_MOESM2_ESM.pdf/9506326)

Spleen weight (mg/g body weight)

(a) Collagen-immunized

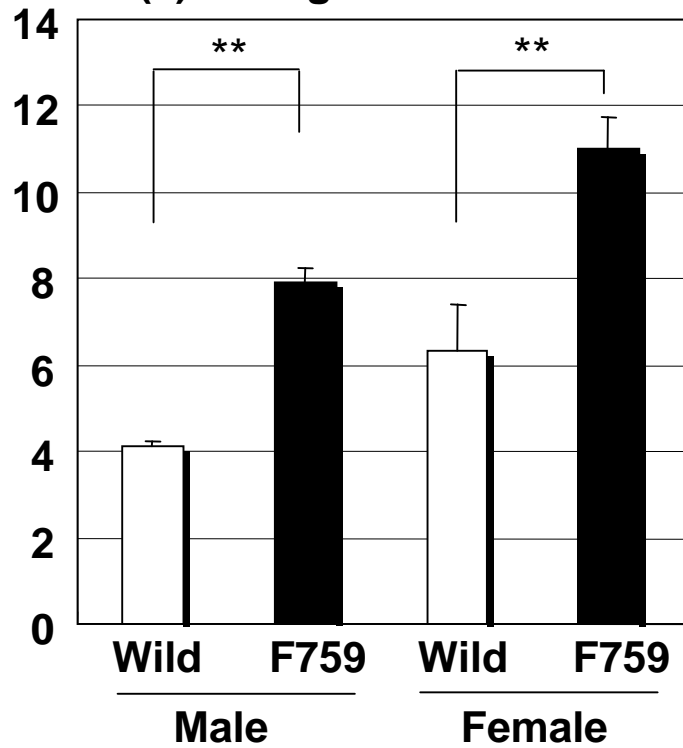

(b) Non-immunized

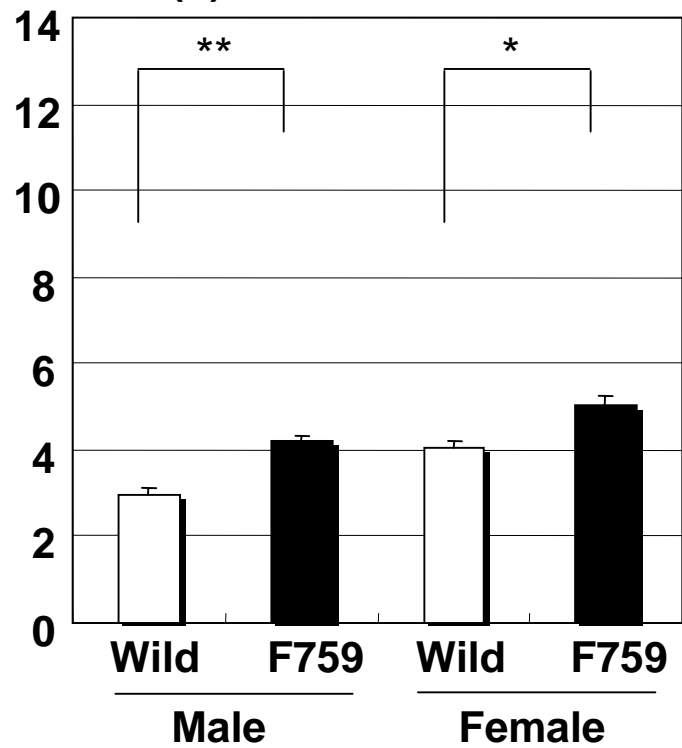

Supplement: MOESM2 [file 9506326]
